# 1 **Optogenetics reprogramming of planktonic cells for biofilm** 2 **formation**

3 Aiguo Xia<sup>a,1</sup>, Shuai Yang<sup>a,1</sup>, Yajia Huang<sup>b,1</sup>, Zhenyu Jin<sup>1</sup>, Lei Ni<sup>1</sup>, Lu Pu<sup>1</sup>, Guang Yang<sup>b,2</sup> and Fan  
4 Jin<sup>a,c,d,2</sup>

5 <sup>a</sup>Hefei National Laboratory for Physical Sciences at the Microscale, University of Science and  
6 Technology of China, Hefei 230026, P. R. China

7 <sup>b</sup>Department of Biomedical Engineering, College of Life Science and Technology, Huazhong  
8 University of Science and Technology, Wuhan 430074, P. R. China

9 <sup>c</sup>Department of Polymer Science and Engineering, University of Science and Technology of  
10 China, Hefei 230026, P. R. China

11 <sup>d</sup>CAS Key Laboratory of Soft Matter Chemistry, University of Science and Technology of  
12 China, Hefei 230026, P. R. China

13 <sup>1</sup>A.G.X, S.Y. and Y.J.H. contributed equally to this work.

14 <sup>2</sup>To whom correspondence should be addressed:

15 **E-mail: [fjinustc@ustc.edu.cn](mailto:fjinustc@ustc.edu.cn); [yang\\_sunny@yahoo.com](mailto:yang_sunny@yahoo.com).**

## 16 **Abstract**

17 Single-cell behaviors play essential roles during early-stage biofilms formation. In this study, we  
18 evaluated whether biofilm formation could be guided by precisely manipulating single cells  
19 behaviors. Thus, we established an illumination method to precisely manipulate the type IV pili  
20 (TFP) mediated motility and microcolony formation of *Pseudomonas aeruginosa* by using a  
21 combination of a high-throughput bacterial tracking algorithm, optogenetic manipulation and  
22 adaptive microscopy. We termed this method as Adaptive Tracking Illumination (ATI). We  
23 reported that ATI enables the precise manipulation of TFP mediated motility and microcolony  
24 formation during biofilm formation by manipulating bis-(3'-5')-cyclic dimeric guanosine  
25 monophosphate (c-di-GMP) levels in single cells. Moreover, we showed that the spatial  
26 organization of single cells in mature biofilms can be controlled using ATI. Thus, the established  
27 method (i.e., ATI) can markedly promote ongoing studies of biofilms.

## 28 **Introduction**

29 Biofilm is the most successful lifestyle that allows microbes to survive and thrive in nature (H. C.  
30 Flemming et al., 2016; Hall-Stoodley, Costerton, & Stoodley, 2004; Hibbing, Fuqua, Parsek, &  
31 Peterson, 2010). Biofilm formation has been reported to occur in several stages; namely, the  
32 transition from free-living single cells to complex microcolonies, secretion of extracellular  
33 polymeric substance (EPS) to enclose microcolonies (H.-C. Flemming & Wingender, 2010),  
34 differentiation and development of three-dimensional morphology (Stewart & Franklin, 2008),  
35 and, ultimately, the release of dispersal cells to restart the lifecycle (McDougald, Rice, Barraud,  
36 Steinberg, & Kjelleberg, 2012). Recent studies have indicated that single-cell motility mechanisms  
37 (Gibiansky et al., 2010), including type IV pili (TFP)- or flagella-mediated motility (Conrad et al.,  
38 2011), and EPS production (Zhao et al., 2013) play essential roles in determining the location and  
39 time of microcolony formation. These fundamental findings not only provide researchers with an  
40 excellent opportunity for developing novel strategies to prevent biofilm formation on medical and  
41 industrial settings, which can cause antibiotic-tolerant infections (Costerton, Stewart, & Greenberg,  
42 1999) and the destruction of flow systems, but also motivate researchers to determine whether  
43 biofilm formation can be completely controlled by precisely manipulating single-cell motility and  
44 microcolony formation during early-stage biofilm formation.

45 Leifer et al. reported that a combination of optogenetic manipulation (Leifer, Fang-Yen, Gershow,  
46 Alkema, & Samuel, 2011) and adaptive microscopy (Tischer, Hilsenstein, Hanson, & Pepperkok,  
47 2014) enables the direct manipulation of free-moving nematode *Caenorhabditis elegans*, thus  
48 motivating the development of a method that can directly manipulate many moving bacteria on a  
49 surface during biofilm formation. Similarly, in this study, using a combination of a high-  
50 throughput bacterial tracking algorithm, optogenetic manipulation, and adaptive microscopy, we

51 first established a method, adaptive tracking illumination (ATI). This method could precisely  
52 illuminate single moving cells through the *in-situ* analysis and tracking of moving bacterial  
53 trajectories. Subsequently, we applied this method to directly manipulate the TFP-mediated  
54 motility and microcolony formation of single *Pseudomonas aeruginosa* cells during early-stage  
55 biofilm formation. Bis-(3'-5')-cyclic dimeric guanosine monophosphate (c-di-GMP) signaling  
56 pathways (Hengge, 2009) are established to govern the pleiotropic behavior of bacteria, including  
57 bacterial motility, EPS production, and biofilm formation. Therefore, we modified the genome of  
58 *P. aeruginosa* by using an optogenetic tool (M. H. Ryu & Gomelsky, 2014), which facilitated the  
59 direct manipulation of the c-di-GMP level in single cells by using near-infrared light. We observed  
60 that precisely manipulating the c-di-GMP level in single cells during early-stage biofilm formation  
61 enabled the guiding of subsequent organization of cells in mature biofilms. Thus, the established  
62 method (i.e., ATI) can markedly promote modern research on biofilms, ranging from fundamental  
63 to industrial studies.

## 64 **Results**

### 65 **ATI enables precise illumination of single *P. aeruginosa* cells.**

66 During biofilm formation, *P. aeruginosa* cells differently deploy their TFP to mediate distinct  
67 motility, with a mobile or an immobile phenotype (Ni et al., 2016). The process involves the  
68 frequent dispersal of mobile cells on surfaces, enabling them to find a habitat that can supply  
69 sufficient nutrients. By contrast, immobile cells stall in their place to form microcolonies. These  
70 distinct TFP-mediated motility phenotypes are thereby expected to affect subsequent biofilm  
71 formation, including the organization and differentiation of cells and the structure of mature  
72 biofilms. To precisely illuminate single *P. aeruginosa* cells with distinct motility, we first acquired

73 the bright-field images of the cells and then tracked them to obtain their trajectories in real time.  
74 This real-time information was further analyzed to identify mobile and immobile cells. Thereafter,  
75 information on the regions containing selected cells with the motility phenotype of interest was  
76 input into a digital micromirror device to generate a mask. The mask was finally projected on these  
77 selected cells through an additional objective. We termed this illumination as ATI (Figure 1a,  
78 Figure 1—figure supplement 1 and Figure 1—figure supplement 2). Our results indicated that  
79 feedback illuminations could generate projected patterns to exactly follow the cell movement  
80 (Figure 1b and Video 1) or single cells divisions (Figure 1c and Video 2) in real time.

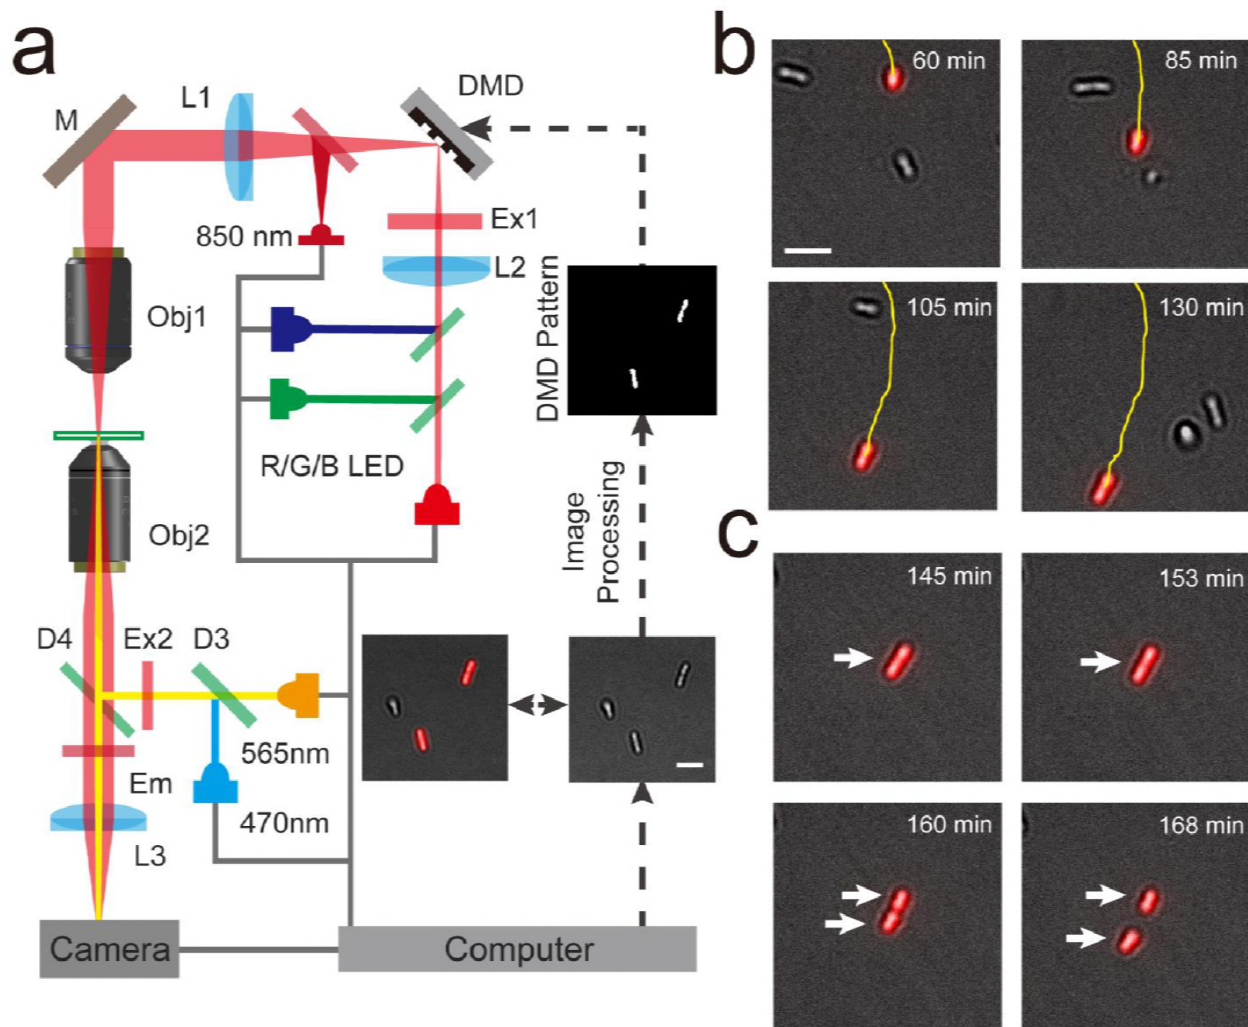

81

82 **Figure 1** with 2 supplements. **Using Adaptive Tracking Illuminations (ATI) to exactly**  
83 **illuminate single *P. aeruginosa* cells on surface.** (a) Schematic drawing of the ATI system. A  
84 high-throughput bacterial tracking algorithm was employed for analyzing cells' behaviors in real  
85 time and the information were immediately feedback to an adaptive microscope equipped with a  
86 digital micromirror device (DMD). (b) One interested cell being tracked and projected in real time  
87 is depicted. (c) The feedback illuminations also can generate projected patterns to exactly follow  
88 the daughter cells after the division of one interested cell. Scale bars for all images are 5 $\mu$ m.

89 **ATI enables precise manipulation of TFP-mediated motility and microcolony formation of**  
90 **single cells.**

91 To directly manipulate the TFP-mediated motility of the selected single cells, we incorporated an  
92 optogenetic part into the chromosome of *P. aeruginosa* by using the mini-CTX system (Hoang,  
93 Kutchma, Becher, & Schweizer, 2000). This part encodes a heme oxygenase (*bphO*) and c-di-  
94 GMP diguanylate cyclase (*bphS*) that can cyclize two GTP molecules to form a c-di-GMP molecule  
95 in the presence of near-infrared light (M. H. Ryu & Gomelsky, 2014). Furthermore, the optogenetic  
96 part enabled the direct manipulation of intracellular c-di-GMP levels by using illumination at 640  
97 nm (Figure 2a). Elevation of c-di-GMP levels is known to repress bacterial motility and promote  
98 biofilm formation (Hengge, 2009). To optimize the intensity of manipulation lights, we varied the  
99 LED light intensity (640 nm) to stimulate optogenetically modified bacteria. Furthermore, we  
100 monitored c-di-GMP levels in single cells by using a fluorescent reporter (Rybtke et al., 2012).  
101 The c-di-GMP reporter encodes two fluorescent proteins. A green fluorescent protein (GFP) is  
102 expressed using a c-di-GMP regulatory promoter (*P<sub>cdrA</sub>*), and a red fluorescent protein (mCherry)  
103 is expressed using a constitutive promoter (*PAI0403*; Figure 2a). Thus, the ratio of fluorescent  
104 intensities derived from GFP ( $F_G$ ) and mCherry ( $F_R$ ) was used to determine the c-di-GMP levels

105 in single cells. We observed that c-di-GMP levels, as indicated by the  $F_G/F_R$  ratio, markedly increa-  
 106 sed 10 folds after 4 hours of illumination ( $> 0.02 \text{ mW}\cdot\text{cm}^{-2}$ ) with 640-nm LED lights (Figure 2—  
 107 figure supplement 1a). Notably, the growth of cell was not affected even using the illumination at  
 108  $0.26 \text{ mW}\cdot\text{cm}^{-2}$  (Figure 2—figure supplement 1b).

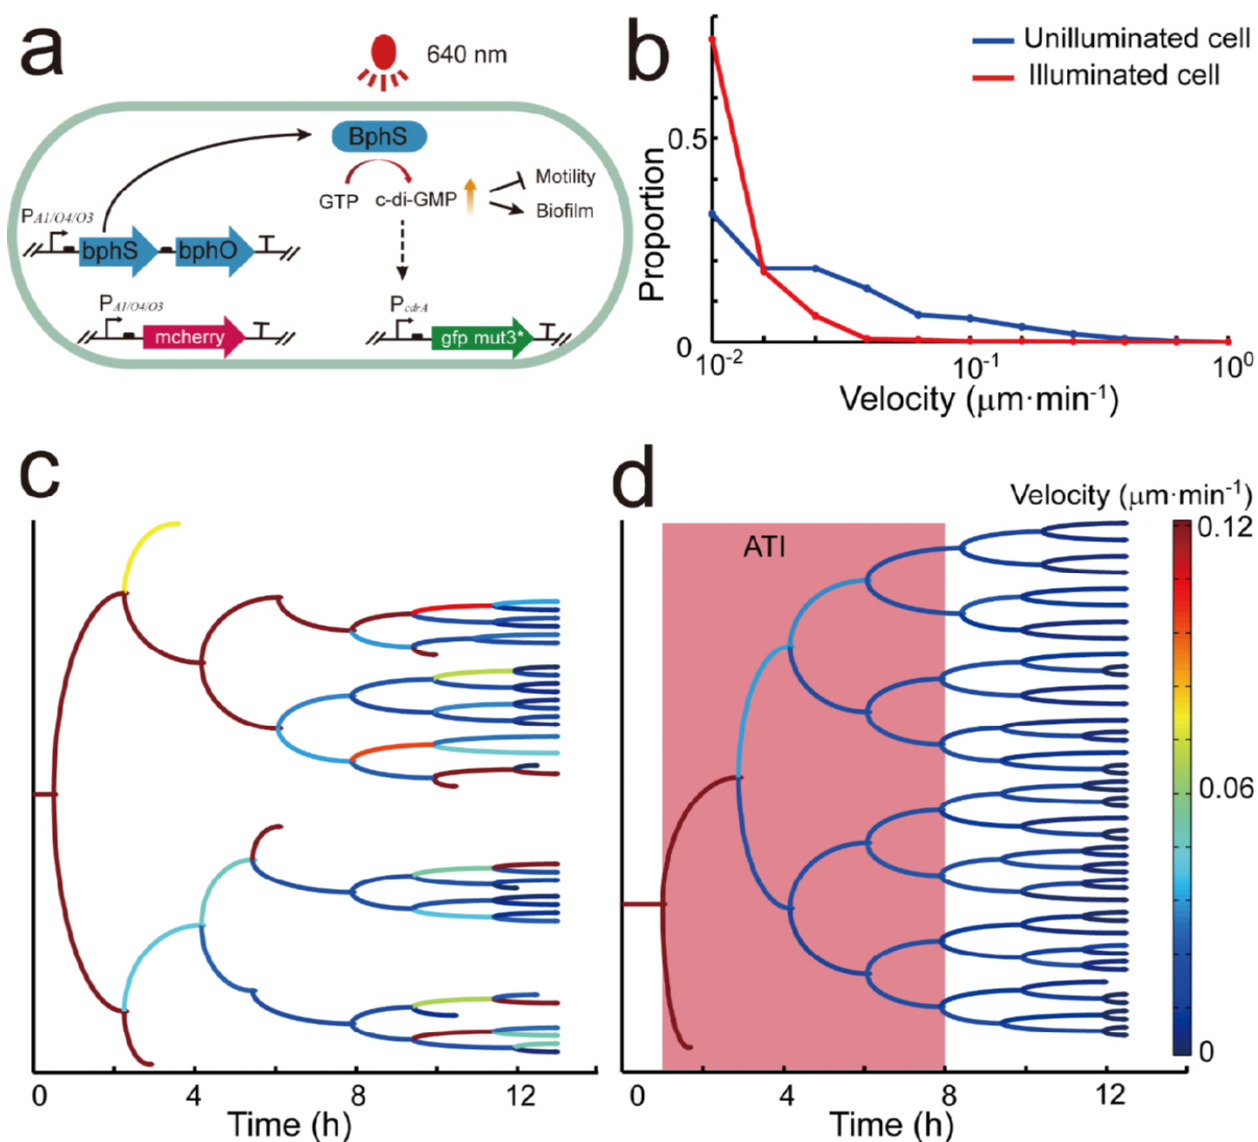

109  
 110 **Figure 2 with 2 supplements. By introducing optogenetic modules, the ATI can precisely**  
 111 **manipulate TFP mediated motility.** (a) Schematic of optogenetic circuit. Optogenetic modules  
 112 encode a c-di-GMP diguanylate cyclase (BphS), which allowed us to manipulate c-di-GMP level

113 using an illumination of 640 nm lights. Expression of GFP *mut3\** under control of the c-di-GMP  
114 regulatory promoter (PcdrA) was used for monitoring the c-di-GMP levels. A mCherry reporter  
115 fused to the constitutive promoter *PAI/O4/O3* served as an internal control. **(b)** The illuminated  
116 cells have much slower velocity than unilluminated cells. Data were analyzed and obtained after  
117 4 hours of manipulation by ATI. **(c)** Genealogical tree of one unilluminated cell and **(d)** one  
118 illuminated cell. The velocity of each cell is color-coded along each lineage. ATI enabled mobile  
119 cells and their offspring to switch to immobile phenotype as indicted by their averaged moving  
120 velocities decreased from 0.2 to 0.01  $\mu\text{m}\cdot\text{min}^{-1}$  and less detachment events. Experiments in **b-d**  
121 were carried out at least three times and one representative example is shown.

122 We first selected 33–66% of single cells with mobile motility and illuminated them (0.05  
123  $\text{mW}\cdot\text{cm}^{-2}$ ) along with their offspring for 7 hours by using ATI. Treatment with ATI for 3 hours  
124 enabled all mobile cells and their offspring to switch to the immobile phenotype, as indicated by  
125 their average moving velocities, which decreased from 0.2 to 0.01  $\mu\text{m}\cdot\text{min}^{-1}$  (Figs. 2b and d and  
126 Video 3). This observation contrasted with the observation that 50% of mobile cells ( $> 0.03$   
127  $\mu\text{m}\cdot\text{min}^{-1}$ ) without ATI treatment remained mobile on surfaces (Figure 2b and c and Video 3).  
128 Wild-type *P. aeruginosa* can spontaneously switch between mobile and immobile phenotypes  
129 during early-stage biofilm formation (Mikkelsen, Sivaneson, & Filloux, 2011), which results in  
130 that the velocity distribution arising from single cells are broadly distributed from 0.01 to 0.5  
131  $\mu\text{m}\cdot\text{min}^{-1}$  (Figure 2b). Moreover, we observed that manipulation by using ATI markedly enhanced  
132 the possibility that the post-division cells remained attached to surfaces (Figure 2d). This  
133 observation contrasted with the observation that unilluminated cells exhibited asymmetrical  
134 detaching behaviors after division (Figure 2c): one daughter cell preferred to remain attached to  
135 surfaces, whereas another cell preferred to detach from surfaces.



136 Simultaneously, we observed that 7 hours of ATI treatment considerably increased the c-di-GMP  
137 levels in these illuminated cells and their offspring, as indicated by the  $F_G/F_R$  ratio, which increased  
138 from 1.5 to 7.5 (Figure 3a, d and Video 3). This observation was in sharp contrast to the observation  
139 that c-di-GMP levels remained low in unilluminated mobile cells (Figure 3a, c and Video 3). The  
140 mCherry-induced fluorescence remained nearly constant in the illuminated and unilluminated cells  
141 (Figure 2—figure supplement 2). Notably, the optogenetic manipulation of single mobile cells and  
142 their offspring enabled these cells to stall in their place to form a microcolony during biofilm  
143 formation, whereas mobile cells and their offspring without optogenetic manipulation were more  
144 likely to move and spread on surfaces (Figure 3b and Video 3). To evaluate how optogenetic  
145 manipulation affects microcolony formation, we calculated the clustering ability of illuminated  
146 and unilluminated cells through hierarchical clustering. Clustering calculation indicated that ATI  
147 enabled single mobile cells to form a microcolony, as indicated by the distance among the daughter  
148 cells ( $< 4 \mu\text{m}$ ; Figure 3d and f). This observation was in sharp contrast to the observation that  
149 unilluminated cells and their offspring were more likely to spread on surfaces, as indicated by the  
150 distance among these daughter cells ( $> 40 \mu\text{m}$ ; Figure 3c and e).

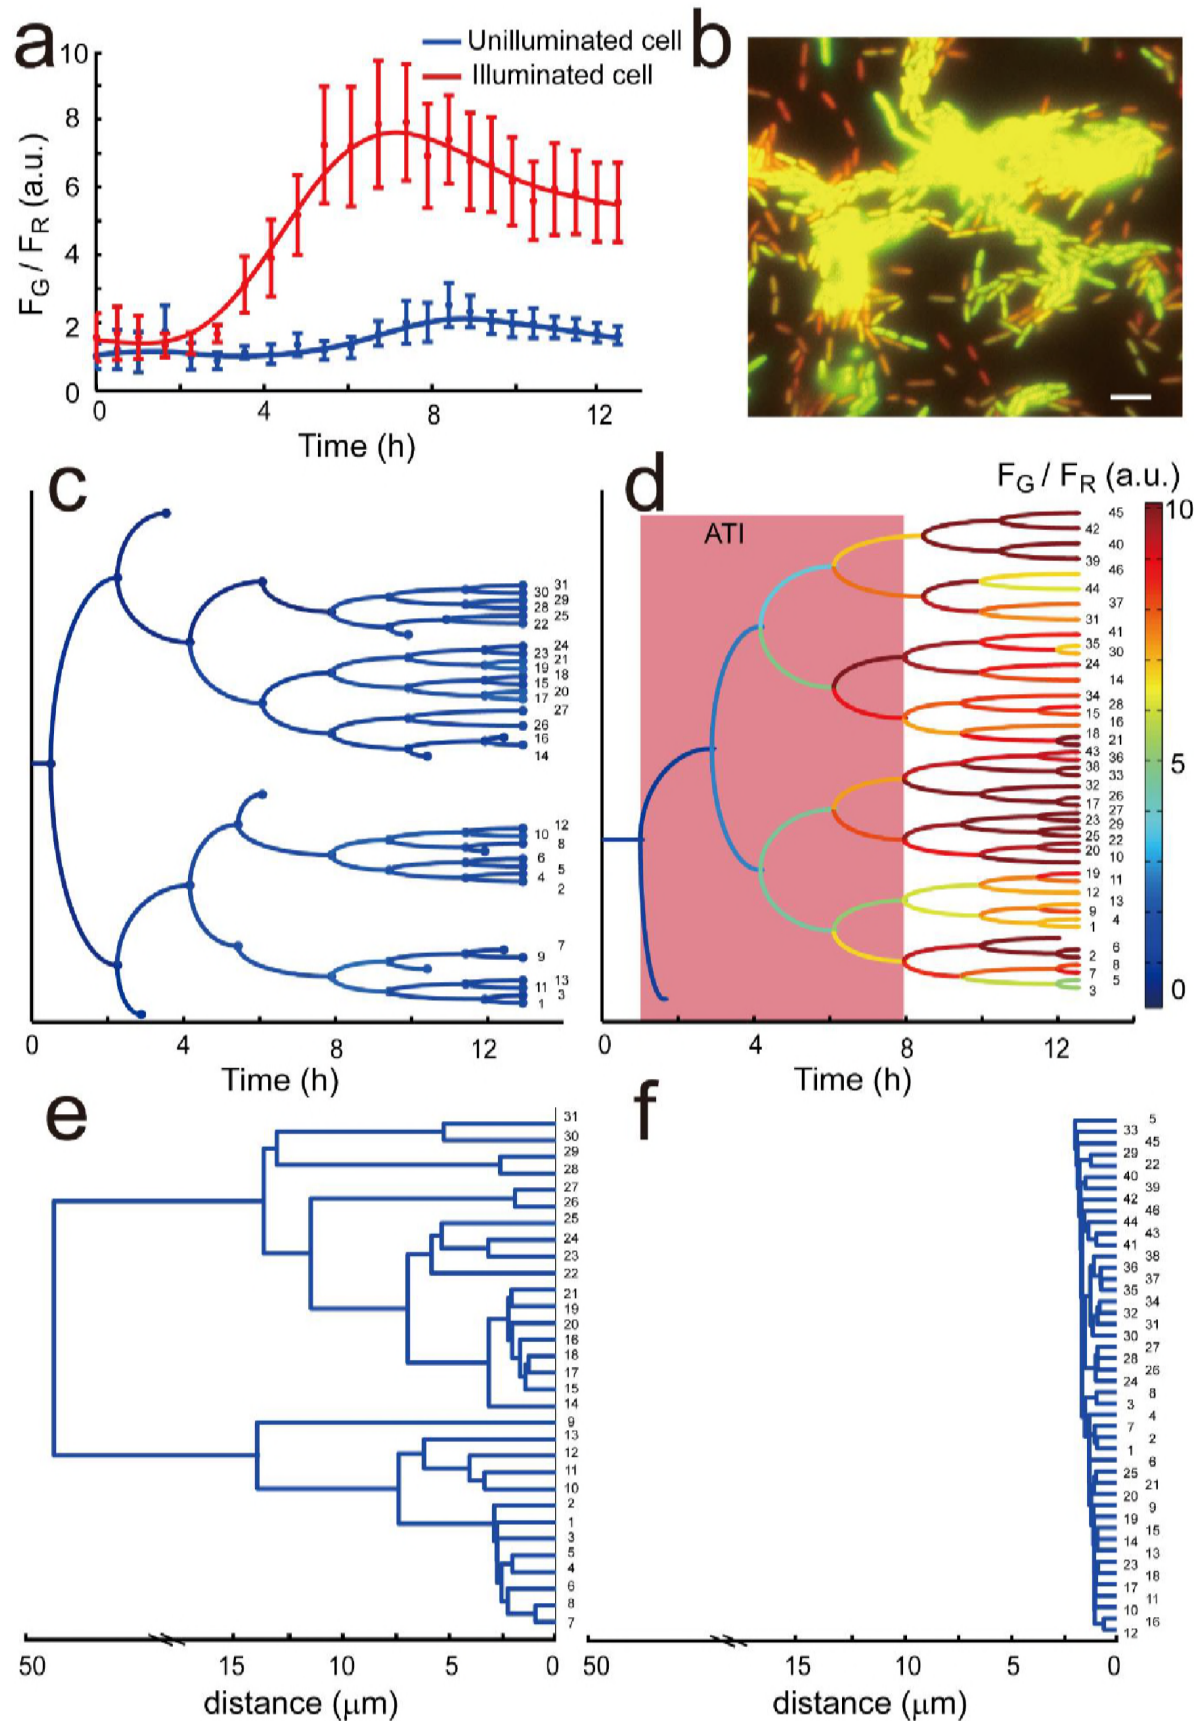

152 **Figure 3. c-di-GMP level was manipulated using ATI system in single cells. (a)** The  
153 illuminated cells and their offspring have fivefold higher levels of c-di-GMP than unilluminated  
154 cells after 6 hours as indicated by the contrast of  $F_G/F_R$ . Error bars represent means  $\pm$  s. d with n =  
155 3 biological replicates. **(b)** A merged image of mCherry and GFP *mut3\** fluorescence microscopy  
156 image was presented after 14 hours. The illuminated cells have brighter green fluorescence, which  
157 indicates higher c-di-GMP level. Scale bar were set at 5 $\mu$ m. The c-di-GMP level from one mother  
158 cell is depicted by Genealogical trees for unilluminated **(c)** and illuminated cell **(d)**, respectively.  
159 **(e)** and **(f)** for the corresponding hierarchical clustering analysis in **(c)** and **(d)**. After manipulation  
160 by ATI for 12 hours, the distance among the daughter cells was less than 4  $\mu$ m, which is in clear  
161 contrast to the largest distance between unilluminated daughter cells larger than 40  $\mu$ m.  
162 Experiments in **b-f** were carried out at least three times and one representative sample is shown.

### 163 **ATI enables the guiding of biofilm formation in *P. aeruginosa*.**

164 After 7 hours of illumination, c-di-GMP levels remained high in the cells and their offspring, even  
165 without further optogenetic manipulation (Video 3). This behavior guided subsequent biofilm  
166 organization by manipulating microcolony formation during early-stage biofilm formation. To  
167 demonstrate this phenomenon, we labeled the optogenetically modified cells by using a green or  
168 red fluorescent protein (EGFP or mCherry), which did not contain the fluorescent reporter of c-di-  
169 GMP. We cocultured these differently labeled cells in a flow cell to facilitate their biofilm  
170 formation, during which, we only selected GFP- or RFP-labeled cells and manipulated them by  
171 using ATI in the first 10 hours. Our results indicated that ATI enabled the selected cells (GFP- or  
172 RFP-labeled cells) and their offspring to form microcolonies in advance, whereas the unselected  
173 cells distributed around the formed microcolonies (Figure 4a). This result was in sharp contrast to  
174 that obtained for GFP- and RFP-labeled cells without ATI treatment (Figure 4—figure supplement

175 1). Thereafter, we continuously cultured these young biofilms (up to 72 hours) with a distinct  
176 organization of cells in dark to allow their maturation. These distinct young biofilms developed to  
177 mature biofilms possessing a distinct spatial organization of GFP- or RFP-labeled cells (Figure  
178 4b). These results revealed that cell manipulation by using ATI during early-stage biofilm  
179 formation enabled the guiding of biofilm formation.

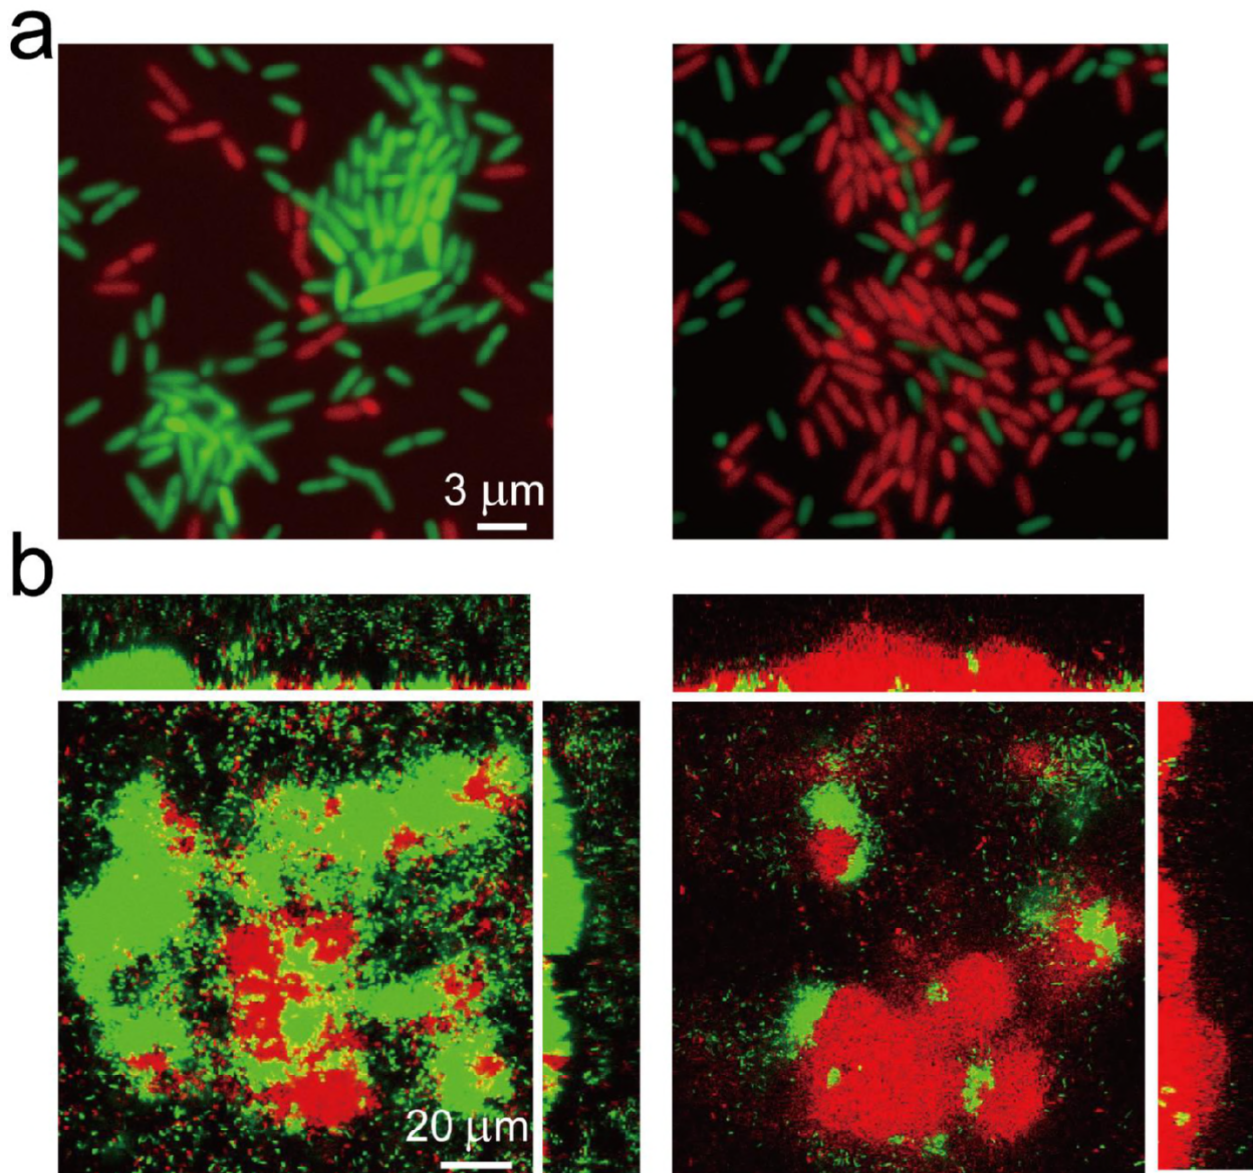

181 **Figure 4** with 1 supplements. **Guiding biofilm formation using ATI in *P. aeruginosa*.** (a) ATI  
182 enables selected cells and their offspring to form microcolonies in advance. The optogenetic  
183 modified cells (do not contain fluorescent reporter of c-di-GMP) labeled by a green (EGFP) or red  
184 (mCherry) fluorescent protein were used for biofilm cultivation in flow cell. Left panel, EGFP-  
185 labeled cells were manipulated by ATI; Right panel, mCherry-labeled cells were selected for  
186 manipulation. The fluorescence image was attained in flow cell at the same time point about  $t \sim 14$   
187 h. (b) The corresponding mature biofilm structure in (a) after 3 days culture. The selected GFP- or  
188 the RFP-labeled cells possess distinctive spatial organizations of biofilms. Experiments in **a-b**  
189 were carried out at least three times and one representative image is depicted.

## 190 **Discussion**

191 We developed the ATI method that could be used to precisely manipulate TFP-mediated motility  
192 of single *P. aeruginosa* cells during early-stage biofilm formation. In this method, the bacteria  
193 were modified using an optogenetic part that enabled illumination with near-infrared light to  
194 directly regulate intracellular c-di-GMP levels. We showed that ATI could manipulate single cells  
195 with a mobile phenotype to switch to an immobile phenotype. Consequently, these manipulated  
196 cells could stall in their place to form microcolonies in advance, whereas unmanipulated cells with  
197 a mobile phenotype were more likely to move and spread on surfaces, facilitating the control of  
198 the location and time of early-stage biofilm formation. Accordingly, we showed that the spatial  
199 organization of single cells could be precisely controlled in a young biofilm of *P. aeruginosa* cells.  
200 Notably, our results indicated that the organization of single cells in young biofilms affected  
201 subsequent cell organization in mature biofilms, which enabled the further control of the structure  
202 and spatial organization of cells in biofilms. It should be emphasized that the strategy used herein

203 to control the spatial organization of bacterial colonies is different than that using micro-three-  
204 dimensional printing (Connell, Kim, Shear, Bard, & Whiteley, 2014).

205 In addition to using ATI to guide biofilm formation, we expect that our method can be used to  
206 answer various questions or resolve problems in microbiology. This is because: 1) The hardware  
207 used to build ATI, mainly an air objective, a commercial projector, and an LED controller, are  
208 quite common and inexpensive; 2) The optical setup of ATI is compatible with that of other  
209 commonly used microscopic techniques, including fluorescence, confocal, and total internal  
210 reflection microscopy; 3) The wavelengths in ATI can be easily expanded to multiple colors to  
211 adapt to different optogenetic tools (Ohlendorf, Vidavski, Eldar, Moffat, & Moglich, 2012; Olson,  
212 Hartsough, Landry, Shroff, & Tabor, 2014; M.-H. Ryu, Fomicheva, Moskvin, & Gomelsky, 2017);  
213 and 4) The software and algorithms used in ATI, including image processing, single-cell tracking,  
214 and analysis of phenotypes, are quite flexible to modifications. These factors allow researchers to  
215 simply integrate the ATI setup to their microscope and quickly modify the algorithms to track  
216 single cells with phenotypes of their interest, thus markedly prompting studies of optogenetic tools.  
217 Notably, the time required for data processing limits the application of ATI for investigating a  
218 quickly evolving bio-systems or cellular processes. For example, data processing of a live image  
219 (processed in a commercial desktop equipped with an intel i7 CPU) in the present study typically  
220 took 3 seconds, limiting the use of ATI for manipulating rapidly swimming bacteria, whose  
221 velocity can typically reach tens of microns per second. In addition to the data processing speed,  
222 the accuracy of the tracking algorithm limits the application of ATI for investigating microbes  
223 with high cell densities. For example, the current ATI cannot be used to manipulate the phenotypes  
224 of single cells during middle-stage biofilm formation because the algorithm cannot accurately

225 track single cells in a dense microcolony. Developing new tracking algorithms or using powerful  
226 computers can address these limitations, thus considerably expanding ATI applications.

## 227 **Materials and Methods**

### 228 **Strains and Growth conditions**

229 Bacterial strains and plasmids used in this study are listed in Table 1. Strains were grown on LB  
230 agar plates at 37°C for 24 hours. Monoclonal colonies were inoculated and cultured with a minimal  
231 medium (FAB) at 37°C with 30 mM glutamate as carbon source under an aerobic condition, in  
232 which the medium contains following compositions per liter: (NH<sub>4</sub>)<sub>2</sub>SO<sub>4</sub>, 2 g/L; Na<sub>2</sub>HPO<sub>4</sub>·12H<sub>2</sub>O,  
233 12.02 g/L; KH<sub>2</sub>PO<sub>4</sub>, 3 g/L; NaCl, 3 g/L; MgCl<sub>2</sub>, 93 g/mL; CaCl<sub>2</sub>·2H<sub>2</sub>O, 14 g/mL; FeCl<sub>3</sub>, 1 uM;  
234 and trace metals solution(CaSO<sub>4</sub>·2H<sub>2</sub>O, 200 mg/L; MnSO<sub>4</sub>·7H<sub>2</sub>O, 200 mg/L; CuSO<sub>4</sub>·5H<sub>2</sub>O, 20  
235 mg/L; ZnSO<sub>4</sub>·7H<sub>2</sub>O, 20 mg/L; CoSO<sub>4</sub>·7H<sub>2</sub>O, 10 mg/L; NaMoO<sub>4</sub>·H<sub>2</sub>O, 10 mg/L; H<sub>3</sub>BO<sub>3</sub>, 5 mg/L)  
236 1 mL/L. The strains were harvested at OD<sub>600</sub> = 2.1, and the bacterial cultures were further diluted  
237 (1:100) in fresh FAB medium to OD<sub>600</sub> = 0.4~0.6 before used.

### 238 **Table 1. Strains, plasmids, and primers used in this study.**

| Categories                                      | Description                                                                                                     | Source            |
|-------------------------------------------------|-----------------------------------------------------------------------------------------------------------------|-------------------|
| <b>Strains</b>                                  |                                                                                                                 |                   |
| PAO1                                            | Wild type <i>P.aeruginosa</i> strain                                                                            | PMID:<br>17059568 |
| PAO1- <i>bphS</i>                               | <i>bphS</i> derivative of PAO1 (wild type)                                                                      | This study        |
| PAO1- <i>bphS</i> -mCherry                      | <i>bphS</i> derivative of PAO1 marked with mCherry                                                              | This study        |
| PAO1- <i>bphS</i> -EGFP                         | <i>bphS</i> derivative of PAO1 marked with EGFP                                                                 | This study        |
| PAO1- <i>bphS</i> -mCherry-<br>pUCP22-PcdrA-GFP | <i>bphS</i> derivative of PAO1 marked with mCherry carrying with<br>a c-di-GMP reporter plasmid based on pUCP22 | This study        |
| <b>Plasmids</b>                                 |                                                                                                                 |                   |

|                          |                                                                                                                                                        |                   |
|--------------------------|--------------------------------------------------------------------------------------------------------------------------------------------------------|-------------------|
| mini-CTX2- <i>bphS</i>   | Tc <sup>r</sup> ; insertion of <i>bphS</i> with <i>PAI/O4/O3</i> promoter constructed by PCR and cloned to HindIII/SpeI sites of mini-CTX2             | This study        |
| mini-Tn7-mCherry         | Ap <sup>r</sup> ,Gm <sup>r</sup> ; insertion of mCherry with <i>PAI/O4/O3</i> promoter constructed by PCR and cloned to KpnI/HindIII sites of mini-Tn7 | This study        |
| mini-Tn7-EGFP            | Ap <sup>r</sup> ,Gm <sup>r</sup> ; insertion of EGFP with <i>PAI/O4/O3</i> promoter constructed by PCR and cloned to KpnI/HindIII sites of mini-Tn7    | This study        |
| pUCP22-PcdrA-GFP         | Gm <sup>r</sup> ; c-di-GMP reporter plasmid based on pUCP22                                                                                            | PMID:<br>22582064 |
| pTNS2                    | Ap <sup>r</sup> ; a helper plasmid for mini-Tn7 site-specific transposition system                                                                     | PMID:<br>15908923 |
| pIND4                    | plasmid carrying the <i>bphS</i> gene                                                                                                                  | PMID:<br>19684165 |
| mini-CTX2                | <i>Tet<sup>r</sup></i> ; tet-FRT-attP- MCS, ori, int, and oriT                                                                                         | PMID:<br>10610820 |
| pUC18T-mini-Tn7T-Gm      | Ap <sup>r</sup> , Gem <sup>r</sup> ; on mini-Tn7T; <i>oriT</i> on pUC18                                                                                | PMID:<br>15908923 |
| pFlp2                    | Ap <sup>r</sup> , source of Flp recombinase                                                                                                            | PMID:<br>9661666  |
| <b>Primers Sequence</b>  |                                                                                                                                                        |                   |
| <i>bphS</i> -HindIII-For | 5'-GCCAAGCTTATGGCTAGAGGGTGCCTCAT-3'                                                                                                                    | This study        |
| <i>bphS</i> -SpeI-Rev    | 5'-GCCACTAGTTCCTTCATACCCGCCGGG-3'                                                                                                                      | This study        |
| mCherry-KpnI-For         | 5'-CGGGGTACCTGCCACCTGACGTCTAAGAA-3'                                                                                                                    | This study        |
| mCherry-HindIII-Rev      | 5'-GAGATAAGCTTTTACTTGTACAGCTCGTCCATG-3'                                                                                                                | This study        |
| EGFP-KpnI-For            | 5'-CGGGGTACCTGCCACCTGACGTCTAAGAA-3'                                                                                                                    | This study        |
| EGFP-HindIII-Rev         | 5'-GAGATAAGCTTTTACTTGTACAGCTCGTCCATG-3'                                                                                                                | This study        |

239 **Construction of optogenetics and c-di-GMP reporter strain in *P. aeruginosa*.**

240 Insertion mutant *bphS* was constructed by mini-CTX system using a modified procedure for  
 241 *P.aeruginosa*. The *bphS* mutants marked with different fluorescent proteins were constructed by  
 242 mini-Tn7 site-specific transposition system using a modified procedures for *P.aeruginosa*. We  
 243 constructed unmarked insertion mutants by Flp-mediated excision of the antibiotic resistance



244 marker. Firstly, *bphS* fragments obtained from the plasmid pIND4 was cloned into the vector mini-  
245 CTX2 with the *PA1/O4/O3* promoter in the upstream of MCS via a two-piece ligation. The  
246 constructed plasmid was electroporated into PAO1 and the corresponding recombinant strain was  
247 identified by screening on LB agar plates containing 1mM IPTG and 100  $\mu\text{g}\cdot\text{mL}^{-1}$  tetracycline.  
248 Thereafter, the strains were electroporated with a pFLP2 plasmid and distinguished on LB agar  
249 plates containing 5% (w/v) sucrose for the excision of resistance marker. Further, the *bphS* mutants  
250 were marked with mCherry/EGFP by using mini-Tn7 system as the similar procedure with mini-  
251 CTX. C-di-GMP reporter plasmid was electroporated to the mCherry/EGFP marked *bphS* mutants  
252 to determine the intercellular c-di-GMP level as required. The constructed plasmids and strains are  
253 listed in the Table 1.

#### 254 **Setup of Adaptive Tracking Illuminations**

255 We schematically show the setup of the Adaptive Tracking Illuminations (ATI) (Figure 1a). More  
256 specifically, an inverted fluorescent microscope (Olympus, IX71) was modified to build the ATI.  
257 The modification includes that: 1) A commercial DMD-based LED projector (Gimi Z3) was used  
258 to replace the original bright-field light source, in which the original lens in the projector were  
259 removed and the three-colors (RGB) LEDs were rewired to connect to an external LED driver  
260 (ThorLabs) controlled by a single chip microcomputer (Arduino UNO r3); 2) The original bright-  
261 field condenser was replaced with an air objective (40 $\times$ , NA = 0.6, Leica); and 3) an additional  
262 850 nm LED light (ThorLabs) was coupled to the illumination optical path using a dichroic mirror  
263 (Semrock) for the bright-field illuminations. Note that 850 nm LED light is a safe light to ensure  
264 that bright-field illuminations do not affect the optogenetics manipulation. The inverted  
265 fluorescent microscope equipped with a 100 $\times$ oil objective and a sCMOS camera (Zyla 4.2 Andor)  
266 was used to collect bright-field images with 0.2 frame rate. The bright-field images were further

267 analyzed to track multiple single cells in real time using a high-throughput bacterial tracking  
268 algorithm coded by Matlab. The projected contours of selected single cells were sent to the DMD  
269 ( $1280 \times 760$  pixels) that directly controlled by a commercial desktop through a VGA port. The  
270 manipulation lights were generated by the red-color LED (640 nm), and were projected on the  
271 single selected cells in real time through the DMD, a multi-band pass filter (446/532/646, Semrock)  
272 and the air objective. Figure 1—figure supplement 2 displays a demo pattern that was projected  
273 using our setup, which indicate that the spatial resolution or the contrast of the micro-projection  
274 reaches  $1.0 \mu\text{m}$  or 50:1, respectively.

### 275 **Manipulation of TFP mediated motility of single cells**

276 Bacterial strain (PAO1-*bphS*-*pcdrA*-GFP-mCherry) were inoculated into a flow cell (Denmark  
277 Technical University) and continuously cultured at  $26.0 \pm 0.1^\circ\text{C}$  by flowing FAB medium  
278 ( $3.0 \text{ mL} \cdot \text{h}^{-1}$ ), in which the flow cell was modified by punching a hole with a 5 mm diameter on  
279 the channel, and the hole was sealed by a coverslip that allows the manipulation lights to pass  
280 through (Figure 1—figure supplement 2b). The inverted fluorescent microscope equipped with a  
281  $100\times$  oil objective and a sCMOS camera was used to collect bright-field or fluorescent images  
282 with 0.2 or 1/1800 frame rate respectively. The power density of manipulation lights was  
283 determined by measuring the power at outlet of the air objective using a power meter (Newport  
284 842-PE). GFP or mCherry was excited using a 480 nm or 565 nm LED lights (ThorLabs) and  
285 imaged using single-band emission filters (Semrock): GFP (520/28 nm) or mCherry (631/36 nm).  
286 In our optogenetics manipulation experiments, the motility of single cells were continuously  
287 monitored in the absence of optogenetics manipulation using bright-field images in the first hour  
288 (Figure 1—figure supplement 1). Real time bacterial tracking algorithm allow us to identify the  
289 mobile or immobile TFP mediated motility type. The moving velocity of single cells are directly

290 calculated by  $|\mathbf{r}(t + \Delta t) - \mathbf{r}(t)|/\Delta t$ , where  $\mathbf{r}(t)$  is the position of the bacterium at the time  $t$ ,  
291  $\Delta t = 30$  min. The cells with moving velocity larger than  $0.03 \mu\text{m}\cdot\text{min}^{-1}$  were defined to the  
292 mobile types. Afterwards, 33-66 % mobile cells were selected to be manipulated using ATI with  
293 the illumination at  $0.05 \text{ mW}\cdot\text{cm}^{-2}$ , which allowed us to compare the results arising from  
294 illuminated or un-illuminated mobile cells in one experiment. The c-di-GMP levels in single cells  
295 were gauged using the ratio of GFP and mCherry intensities.

### 296 **Guiding biofilm formation using ATI**

297 Bacterial strains of PAO1-*bphS*-EGFP and PAO1-*bphS*-mCherry were 1:1 mixed and inoculated  
298 into the modified flow cell to continuously culture at  $26.0 \pm 0.1^\circ\text{C}$  by flowing FAB medium  
299 ( $3.0 \text{ mL} \cdot \text{h}^{-1}$ ). The inverted fluorescent microscope equipped with a 100 $\times$ oil objective and a  
300 sCMOS camera was used to collect bright-field or fluorescent images with 0.2 or 1/1800 frame  
301 rate respectively. The cells with green or red fluorescence were selected respectively to be  
302 manipulated using ATI with a power density of  $0.05 \text{ mW}\cdot\text{cm}^{-2}$  during the first 10 hours.  
303 Afterwards, the flow cell contains the distinctive young biofilms were continuously cultured up to  
304 3 days in the dark to allow these young biofilms to mature. Finally, a laser-scan confocal  
305 microscope (Olympus FV1000) equipped with a 100 $\times$ oil objective was used to image the cells  
306 organizations as well as the three-dimensional (3D) structures of the mature biofilms using z-axis  
307 scanning ( $0.5 \mu\text{m}$  per step). The confocal images acquired in different z-positions were used to  
308 reconstruct the structure of mature biofilms using software ImageJ. Experiments of biofilm  
309 cultivation were carried out at least three times.

### 310 **Acknowledgements**

311 We thank Dr. M. Gomelsky for kindly providing optogenetics plasmid. This work was financially  
312 supported by National Natural Science Foundation of China (21474098, 21274141, 21522406)  
313 and Fundamental Research Funds for Central Universities (WK2340000066, WK2030020023).

### 314 **Competing interests**

315 All authors declare no competing interests.

### 316 **References**

- 317 Connell, J. L., Kim, J., Shear, J. B., Bard, A. J., & Whiteley, M. (2014). Real-time monitoring of  
318 quorum sensing in 3D-printed bacterial aggregates using scanning electrochemical microscopy.  
319 *Proceedings of the National Academy of Sciences of the United States of America*, *111*(51), 18255-  
320 18260. doi: 10.1073/pnas.1421211111
- 321 Conrad, J. C., Gibiansky, M. L., Jin, F., Gordon, V. D., Motto, D. A., Mathewson, M. A., . . .  
322 Wong, G. C. L. (2011). Flagella and Pili-Mediated Near-Surface Single-Cell Motility Mechanisms  
323 in *P. aeruginosa*. *Biophysical Journal*, *100*(7), 1608-1616. doi: 10.1016/j.bpj.2011.02.020
- 324 Costerton, J. W., Stewart, P. S., & Greenberg, E. P. (1999). Bacterial biofilms: A common cause  
325 of persistent infections. *Science*, *284*(5418), 1318-1322.
- 326 Flemming, H.-C., & Wingender, J. (2010). The biofilm matrix. *Nature Reviews Microbiology*, *8*(9),  
327 623-633.
- 328 Flemming, H. C., Wingender, J., Szewzyk, U., Steinberg, P., Rice, S. A., & Kjelleberg, S. (2016).  
329 Biofilms: an emergent form of bacterial life. *Nature Reviews Microbiology*, *14*(9), 563-575. doi:  
330 10.1038/nrmicro.2016.94

- 331 Gibiansky, M. L., Conrad, J. C., Jin, F., Gordon, V. D., Motto, D. A., Mathewson, M. A., . . .  
332 Wong, G. C. L. (2010). Bacteria Use Type IV Pili to Walk Upright and Detach from Surfaces.  
333 *Science*, 330(6001), 197-U150. doi: 10.1126/science.1194238
- 334 Hall-Stoodley, L., Costerton, J. W., & Stoodley, P. (2004). Bacterial biofilms: From the natural  
335 environment to infectious diseases. *Nature Reviews Microbiology*, 2(2), 95-108. doi:  
336 10.1038/nrmicro821
- 337 Hengge, R. (2009). Principles of c-di-GMP signalling in bacteria. *Nature Reviews Microbiology*,  
338 7(4), 263-273. doi: 10.1038/nrmicro2109
- 339 Hibbing, M. E., Fuqua, C., Parsek, M. R., & Peterson, S. B. (2010). Bacterial competition:  
340 surviving and thriving in the microbial jungle. *Nature Reviews Microbiology*, 8(1), 15-25. doi:  
341 10.1038/nrmicro2259
- 342 Hoang, T. T., Kutchma, A. J., Becher, A., & Schweizer, H. P. (2000). Integration-Proficient  
343 Plasmids for *Pseudomonas aeruginosa*: Site-Specific Integration and Use for Engineering of  
344 Reporter and Expression Strains. *Plasmid*, 43(1), 59-72. doi:  
345 <http://dx.doi.org/10.1006/plas.1999.1441>
- 346 Leifer, A. M., Fang-Yen, C., Gershow, M., Alkema, M. J., & Samuel, A. D. T. (2011). Optogenetic  
347 manipulation of neural activity in freely moving *Caenorhabditis elegans*. *Nature Methods*, 8(2),  
348 147-U171. doi: 10.1038/nmeth.1554
- 349 McDougald, D., Rice, S. A., Barraud, N., Steinberg, P. D., & Kjelleberg, S. (2012). Should we  
350 stay or should we go: mechanisms and ecological consequences for biofilm dispersal. *Nature*  
351 *Reviews Microbiology*, 10(1), 39-50. doi: 10.1038/nrmicro2695

- 352 Mikkelsen, H., Sivaneson, M., & Filloux, A. (2011). Key two-component regulatory systems that  
353 control biofilm formation in *Pseudomonas aeruginosa*. *Environmental Microbiology*, *13*(7), 1666-  
354 1681. doi: 10.1111/j.1462-2920.2011.02495.x
- 355 Ni, L., Yang, S., Zhang, R., Jin, Z., Chen, H., Conrad, J. C., & Jin, F. (2016). Bacteria differently  
356 deploy type-IV pili on surfaces to adapt to nutrient availability. *NPJ Biofilms Microbiomes*, *2*,  
357 15029. doi: 10.1038/npjbiofilms.2015.29
- 358 Ohlendorf, R., Vidavski, R. R., Eldar, A., Moffat, K., & Moglich, A. (2012). From Dusk till Dawn:  
359 One-Plasmid Systems for Light-Regulated Gene Expression. *Journal of Molecular Biology*,  
360 *416*(4), 534-542. doi: 10.1016/j.jmb.2012.01.001
- 361 Olson, E. J., Hartsough, L. A., Landry, B. P., Shroff, R., & Tabor, J. J. (2014). Characterizing  
362 bacterial gene circuit dynamics with optically programmed gene expression signals. *Nature*  
363 *Methods*, *11*(4), 449-+. doi: 10.1038/nmeth.2884
- 364 Rybtke, M. T., Borlee, B. R., Murakami, K., Irie, Y., Hentzer, M., Nielsen, T. E., . . . Tolker-  
365 Nielsen, T. (2012). Fluorescence-Based Reporter for Gauging Cyclic Di-GMP Levels in  
366 *Pseudomonas aeruginosa*. *Applied and Environmental Microbiology*, *78*(15), 5060-5069. doi:  
367 10.1128/aem.00414-12
- 368 Ryu, M.-H., Fomicheva, A., Moskvina, O. V., & Gomelsky, M. (2017). Optogenetic Module for  
369 Dichromatic Control of c-di-GMP Signaling. *Journal of Bacteriology*. doi: 10.1128/jb.00014-17
- 370 Ryu, M. H., & Gomelsky, M. (2014). Near-infrared Light Responsive Synthetic c-di-GMP Module  
371 for Optogenetic Applications. *Acs Synthetic Biology*, *3*(11), 802-810. doi: 10.1021/sb400182x
- 372 Stewart, P. S., & Franklin, M. J. (2008). Physiological heterogeneity in biofilms. *Nature Reviews*  
373 *Microbiology*, *6*(3), 199-210. doi: 10.1038/nrmicro1838

374 Tischer, C., Hilsenstein, V., Hanson, K., & Pepperkok, R. (2014). Adaptive fluorescence  
375 microscopy by online feedback image analysis. In J. C. Waters & T. Wittmann (Eds.), *Quantitative*  
376 *Imaging in Cell Biology* (Vol. 123, pp. 489-503). San Diego: Elsevier Academic Press Inc.  
377 Zhao, K., Tseng, B. S., Beckerman, B., Jin, F., Gibiansky, M. L., Harrison, J. J., . . . Wong, G. C.  
378 L. (2013). Psl trails guide exploration and microcolony formation in *Pseudomonas aeruginosa*  
379 biofilms. *Nature*, 497(7449), 388-+. doi: 10.1038/nature12155

380 **Figure Supplements**

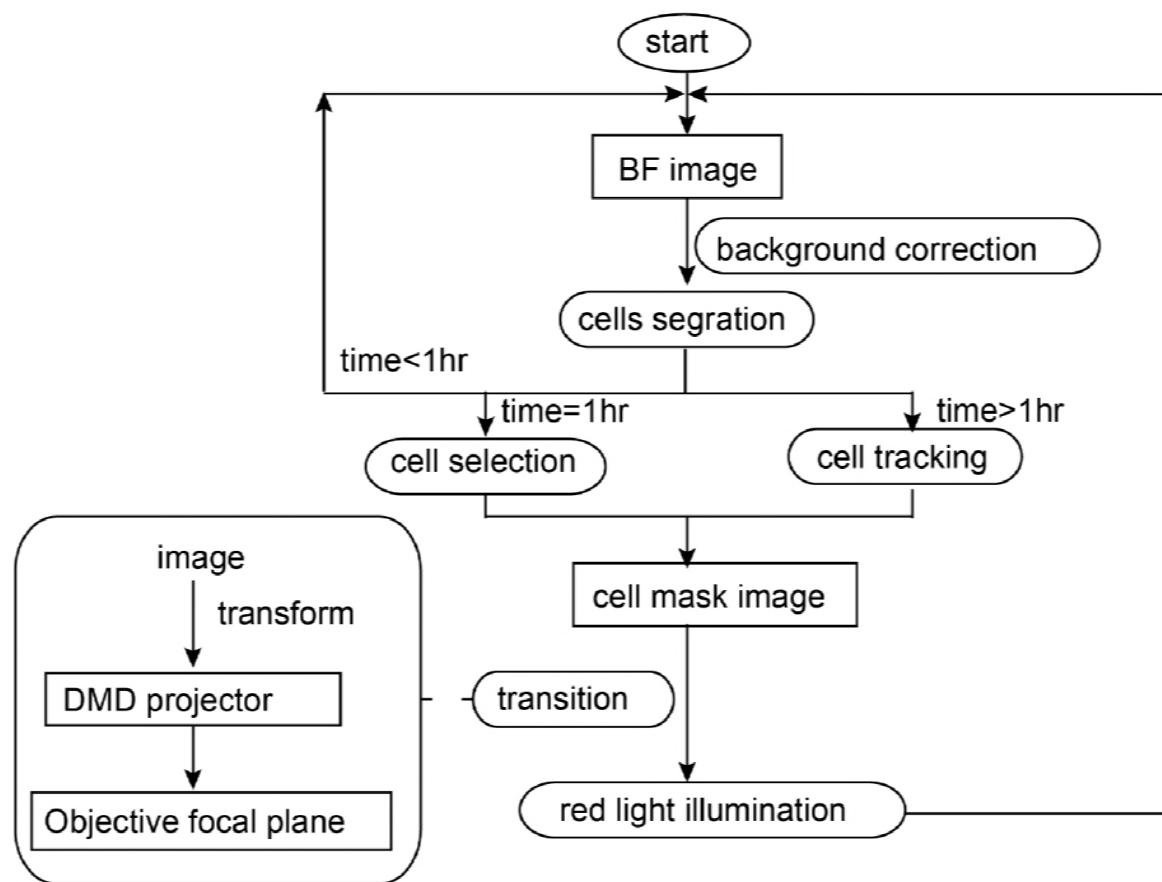

381  
382 **Figure 1—figure supplement 1.** Data analysis with interactive information feedback system. The  
383 process was illustrated in a simplified sequence flow diagram. Simply, bright field images were  
384 taken to recognize and segment the single bacteria using an image processing algorithm coded by  
385 MATLAB; Real time information of the selected cells was secondly transferred to a digital  
386 micromirror device (DMD) to generate a mask; The selected cells were finally illuminated using  
387 the projected mask through an additional long working distance objective.



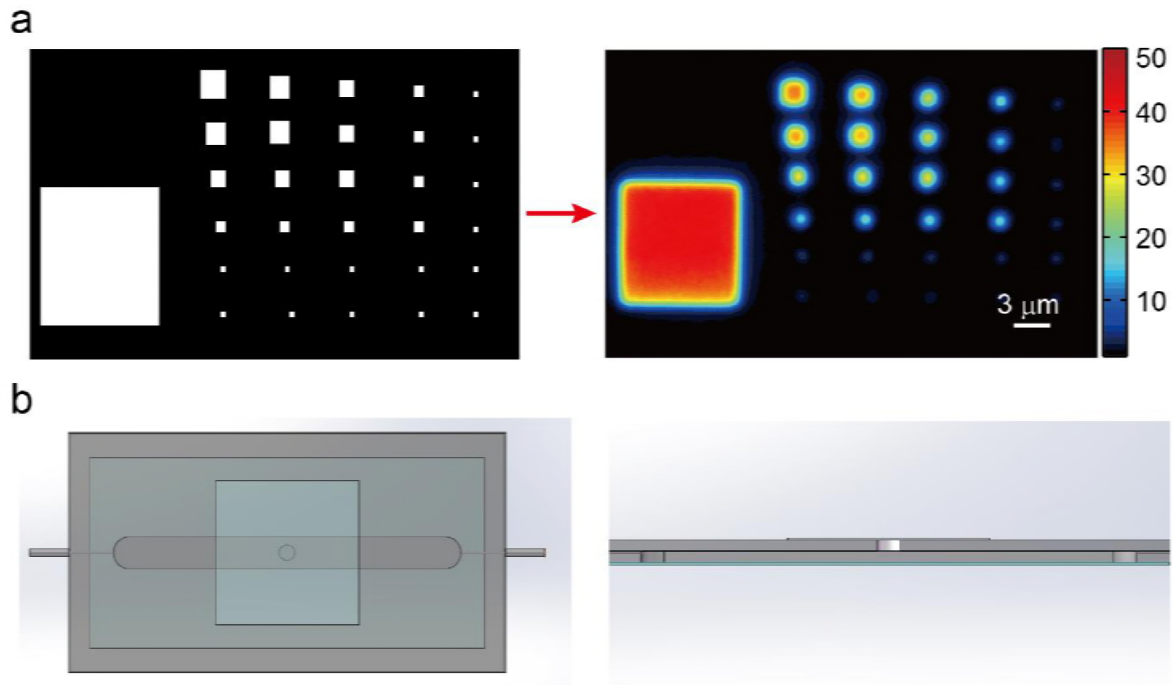

388

389 **Figure 1—figure supplement 2. (a)** A sequence demon patterns with different size were projected  
390 using our ATI system. The spatial resolution can reach up to 1.0  $\mu\text{m}$ , which is smaller than length  
391 of single *P. aeruginosa* cells (about 2  $\mu\text{m}$ ). The ATI system also has high contrast ratio with 50:1.  
392 **(b)** Biofilm cultivation was carried out in an adaptive flow cell system. The schematic diagram of  
393 the adaptive flow cell is presented.

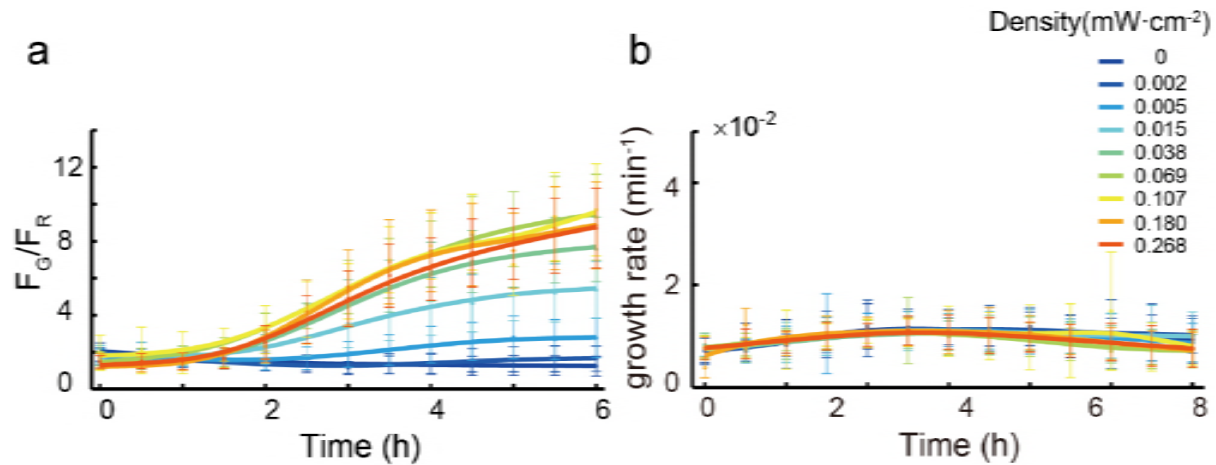

394

395 **Figure 2—figure supplement 1. (a)** Kinetics of  $F_G/F_R$  were measured at indicated times with  
396 manipulation by ATI under different illumination intensity for 4 hours. **(b)** Relationship between  
397 cell growth rate and different illuminations intensity. The intensity being chosen for carrying out  
398 experiment ( $0.05 \text{ mW}\cdot\text{cm}^{-2}$ ) does not affect the growth rate of interested cells. Error bars in **a-b**  
399 represent means  $\pm$  s. d with  $n = 3$  biological replicates.

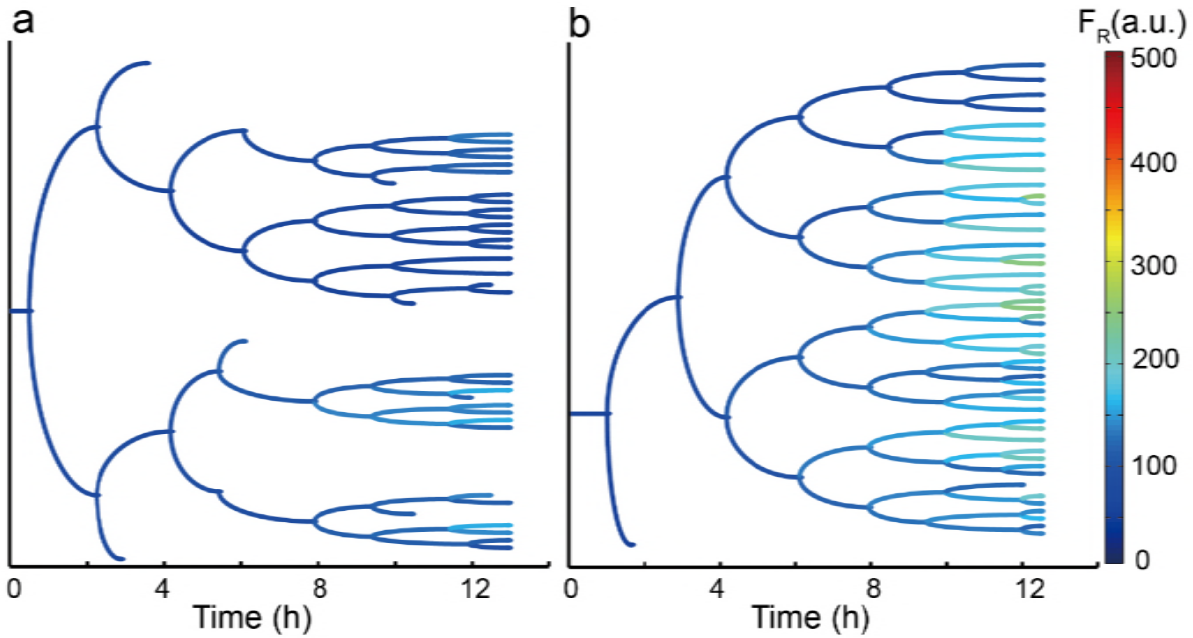

400

401 **Figure 2—figure supplement 2.** Genealogical tree of one unilluminated cell (a) and one  
402 illuminated cell (b) was used to display the mCherry fluorescence intensity of its offspring  
403 separately. The fluorescence arose from mCherry, which is used as an internal control, nearly  
404 remains consistent in daughter cells with illuminated or unilluminated.

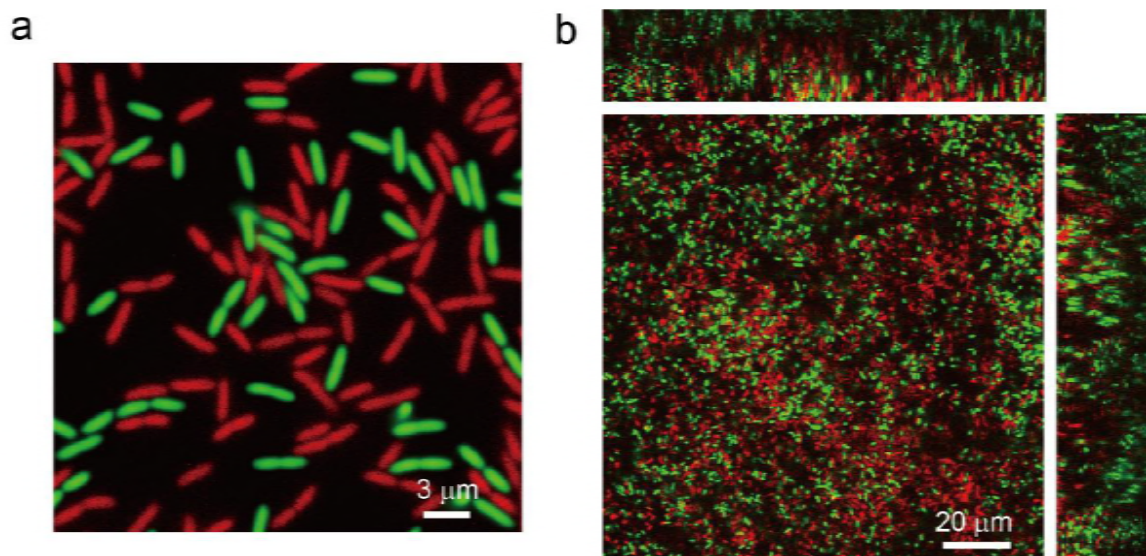

405

406 **Figure 4—figure supplement 1.** Two different labeled cells with mCherry and EGFP were co-  
407 cultured in a flow cell to allow them to form biofilms. No cells are selected to be manipulated by  
408 ATI. **(a)** and **(b)** were captured at  $t \sim 10$  h or 3 days, respectively.

## 409 **Video Legends**

410 **Video 1.** One interested cell being tracked and projected in real time is depicted. Red color  
411 represents the region of red LED illumination.

412 **Video 2.** One interested cell being tracked and projected in real time is depicted. Red color  
413 represents the region of red LED illumination.

414 **Video 3.** Single cells are precisely illuminated by ATI via *in situ* analyzing and tracking bacteria.  
415 The left panel shows the merged images of GFP mut3\* and mCherry fluorescence microscopy  
416 images changed over time. The right panel shows the merged images of red LED projected patterns  
417 and bright field images as the same to left panel. The fluorescence intensity of GFP mut3\* in those  
418 illuminated cells and their offspring (as shown red color merged in right panel) is significantly  
419 increased after using ATI for 7 hours, which is sharply contrast to that the fluorescence intensity  
420 of GFP mut3\* in those unilluminated mobile cells remain in low.
